# Supplementary material
Source: PubMed Central journal article supplement (PMC6487547)
Supplement: jama-321-1576-s003.pdf [file jama-321-1576-s003.pdf]

Jack SM, Boyle M, McKee C, et al. Effect of addition of an intimate partner violence intervention to a nurse home visitation program on maternal quality of life: a randomized clinical trial. *JAMA*. doi:10.1001/jama.2019.3211

## **Data Sharing Statement**

### **Data**

**Data available:** No
